# Supplementary material
Source: publisher site journal article supplement (https://www.dovepress.com/article/292556)
Supplement: Supplementary file 1 [file get_supplementary_file.php]

Table S1. VIT regimen, 21-day cycle

| Drug | Dose and schedule |
| --- | --- |
| VCR | 1.5mg/m2/day (≯2mg) i.v. on day 1 |
| Atropine | 0.01mg/kg/day subcutaneous ejection (0.5h prior to CPT-11) on days 1-5 |
| CPT-11 | 50mg/m2/day i.v.drip (90min) on days 1-5 |
| TMZ | 100mg/m2/day po (0.5h prior to CPT-11) on days 1-5 |

Table S2. Primers for UGT1A detection

| Polymorphic site | Sequence of the primer (5’→3’) | Length of amplicon |
| --- | --- | --- |
| UGT1A*6 | Forward: TCCCTGCTACCTTTGTGGAC | 387bp |
| Reverse: ATGGCACAGGGTACGTCTTC |
| UGT1A*28 | Forward: CTCCCTGCTACCTTTGTGGACTGA | 439bp |
| Reverse: ACAACGAGGCGTCAGGTGCTA |

Table S3. The estimated EFS and OS rate of the studied group.

|  | UGT1A1*6 | | | |  | UGT1A1*28 | | | |
| --- | --- | --- | --- | --- | --- | --- | --- | --- | --- |
|  | EFS | | OS | |  | EFS | | OS | |
| Genotype | WT | MT | WT | MT |  | WT | MT | WT | MT |
| 1-year | 61.3 | 58.3 | 90.3 | 91.7 |  | 51.6 | 70.0 | 93.9 | 80.0 |
| 2-year | 41.9 | 25.0 | 77.4 | 75.0 |  | 33.4 | 50.0 | 78.8 | 70.0 |
| 3-year | 25.8 | 16.7 | 54.8 | 41.7 |  | 27.3 | 20.0 | 54.5 | 40.0 |
| 4-year | 18.4 | Undefined | 43.1 | 25.0 |  | 20.5 | 10.0 | 43.3 | 20.0 |
| 5-year | 18.4 | Undefined | 37.7 | Undefined |  | 20.5 | Undefined | 30.3 | Undefined |
